# Supplementary material
Source: publisher figshare collection journal article supplement (https://sage.figshare.com/ndownloader/files/13047566)
Supplement: Supplementary file 1 [file 13047566]

ONLINE SUPPLEMENT

to article in

AMERICAN SOCIOLOGICAL REVIEW, 2018, VOL. 83

**Who Are the “Illegals”? The Social Construction of Illegality in the United States**

René D. Flores  
*University of Chicago*

Ariela Schachter  
*Washington University in St. Louis*

**Table S1.** Respondent Characteristics

|                                           | <i>Proportion or<br/>Mean (SD)</i> | <i>N</i> |
|-------------------------------------------|------------------------------------|----------|
| Democrat or Lean Democrat                 | .481                               | 1,484    |
| Republican or Lean Republican             | .454                               | 1,484    |
| Interested in Politics (yes = 1)          | .461                               | 1,504    |
| Conservative Political Ideology (yes = 1) | .556                               | 1,467    |
| College Degree + (ref. = less than BA)    | .554                               | 1,507    |
| Age                                       | 57.538 (16.326)                    | 1,490    |
| Woman (ref. = man)                        | .513                               | 1,505    |

**Table S2.** Alternative Model Specifications, Log Odds and Standard Errors

|                                                                          | Logit: Suspect<br>Illegality |        | Conditional Logit:<br>Suspect Illegality |        | Logit: Notify Law<br>Enforcement |        | Conditional Logit:<br>Notify Law<br>Enforcement |        |
|--------------------------------------------------------------------------|------------------------------|--------|------------------------------------------|--------|----------------------------------|--------|-------------------------------------------------|--------|
|                                                                          | Log Odds                     | (SE)   | Log Odds                                 | (SE)   | Log Odds                         | (SE)   | Log Odds                                        | (SE)   |
| Country of Origin (ref. = Mexico)                                        |                              |        |                                          |        |                                  |        |                                                 |        |
| El Salvador                                                              | .005                         | (.096) | -.024                                    | (.176) | .007                             | (.109) | .259                                            | (.284) |
| Cuba                                                                     | -.107                        | (.093) | -.242                                    | (.174) | -.061                            | (.102) | -.438                                           | (.276) |
| Argentina                                                                | -.141                        | (.094) | -.309                                    | (.176) | -.050                            | (.108) | -.548*                                          | (.274) |
| Haiti                                                                    | -.165                        | (.099) | -.196                                    | (.180) | .051                             | (.110) | -.224                                           | (.283) |
| Nigeria                                                                  | -.166                        | (.101) | -.236                                    | (.188) | -.080                            | (.112) | -.018                                           | (.290) |
| Somalia                                                                  | -.126                        | (.096) | -.189                                    | (.179) | .110                             | (.105) | .001                                            | (.278) |
| Syria                                                                    | -.027                        | (.095) | -.168                                    | (.181) | .145                             | (.104) | .197                                            | (.278) |
| Pakistan                                                                 | -.216*                       | (.101) | -.111                                    | (.183) | -.055                            | (.107) | -.159                                           | (.275) |
| India                                                                    | -.226*                       | (.099) | -.181                                    | (.182) | -.149                            | (.109) | -.377                                           | (.270) |
| China                                                                    | -.263**                      | (.101) | -.256                                    | (.180) | -.206                            | (.111) | -.584*                                          | (.281) |
| Korea                                                                    | -.276**                      | (.101) | -.464**                                  | (.175) | -.058                            | (.107) | -.330                                           | (.270) |
| Cambodia                                                                 | -.198                        | (.102) | -.363*                                   | (.174) | -.119                            | (.109) | -.354                                           | (.290) |
| Poland                                                                   | -.254*                       | (.099) | -.492**                                  | (.181) | -.022                            | (.107) | -.156                                           | (.269) |
| Italy                                                                    | -.360***                     | (.101) | -.288                                    | (.184) | -.281*                           | (.116) | -.470                                           | (.287) |
| Canada                                                                   | -.283**                      | (.098) | -.562**                                  | (.183) | -.113                            | (.113) | -.442                                           | (.288) |
| Receives Govt. Benefits (ref. = none)                                    |                              |        |                                          |        |                                  |        |                                                 |        |
| Welfare                                                                  | -.033                        | (.061) | -.080                                    | (.107) | .105                             | (.066) | -.063                                           | (.165) |
| SSI                                                                      | -.173**                      | (.061) | -.256*                                   | (.107) | .034                             | (.070) | .118                                            | (.170) |
| Medicaid                                                                 | -.173**                      | (.060) | -.354***                                 | (.106) | -.077                            | (.072) | -.154                                           | (.166) |
| Food stamps                                                              | -.096                        | (.060) | -.049                                    | (.108) | .114                             | (.065) | .148                                            | (.165) |
| EITC                                                                     | -.306***                     | (.061) | -.532***                                 | (.111) | .013                             | (.068) | -.261                                           | (.168) |
| Police Record (ref. = no record)                                         |                              |        |                                          |        |                                  |        |                                                 |        |
| White-collar crime                                                       | .509***                      | (.059) | .599***                                  | (.099) | .580***                          | (.073) | .822***                                         | (.147) |
| Violent crime                                                            | .790***                      | (.061) | .960***                                  | (.099) | .911***                          | (.077) | 1.824***                                        | (.158) |
| Stereotypical immigrant crime                                            | .914***                      | (.060) | 1.054***                                 | (.103) | .871***                          | (.077) | 1.633***                                        | (.160) |
| Minor infraction                                                         | .002                         | (.058) | -.113                                    | (.103) | .044                             | (.072) | -.041                                           | (.161) |
| Occupation (ref. = unemployed)                                           |                              |        |                                          |        |                                  |        |                                                 |        |
| Low-status, informal                                                     | -.054                        | (.053) | -.131                                    | (.101) | -.099                            | (.062) | -.337*                                          | (.160) |
| Low-status, formal                                                       | -.370***                     | (.056) | -.684***                                 | (.100) | -.234***                         | (.066) | -.501***                                        | (.151) |
| High-status, informal                                                    | -.143*                       | (.056) | -.319**                                  | (.100) | -.204***                         | (.061) | -.339*                                          | (.156) |
| High-status, formal                                                      | -.244***                     | (.055) | -.480***                                 | (.099) | -.157*                           | (.063) | -.331*                                          | (.152) |
| Gender (ref. = man)                                                      |                              |        |                                          |        |                                  |        |                                                 |        |
| Woman                                                                    | -.033                        | (.035) | -.037                                    | (.063) | -.053                            | (.040) | -.111                                           | (.099) |
| Age (ref. = 20)                                                          |                              |        |                                          |        |                                  |        |                                                 |        |
| 30                                                                       | -.160**                      | (.055) | -.233*                                   | (.101) | .022                             | (.062) | -.118                                           | (.149) |
| 40                                                                       | -.221***                     | (.057) | -.317**                                  | (.101) | -.131*                           | (.065) | -.370*                                          | (.157) |
| 50                                                                       | -.207***                     | (.055) | -.349***                                 | (.101) | -.076                            | (.064) | -.429**                                         | (.147) |
| 60                                                                       | -.206***                     | (.055) | -.218*                                   | (.100) | -.143*                           | (.063) | -.530***                                        | (.157) |
| Years Living in the U.S. (ref. = 1 year)                                 |                              |        |                                          |        |                                  |        |                                                 |        |
| 5                                                                        | -.098                        | (.055) | .051                                     | (.102) | -.058                            | (.062) | -.061                                           | (.157) |
| 10                                                                       | -.129*                       | (.054) | -.034                                    | (.102) | -.078                            | (.064) | .155                                            | (.159) |
| 15                                                                       | -.101                        | (.057) | -.088                                    | (.100) | -.046                            | (.065) | .016                                            | (.156) |
| 20                                                                       | -.190***                     | (.056) | -.277**                                  | (.099) | -.145*                           | (.063) | -.187                                           | (.152) |
| English Fluency (ref. = no English)                                      |                              |        |                                          |        |                                  |        |                                                 |        |
| Adequate English                                                         | -.370***                     | (.050) | -.419***                                 | (.091) | -.284***                         | (.055) | -.550***                                        | (.137) |
| Good, accented English                                                   | -.389***                     | (.051) | -.543***                                 | (.089) | -.268***                         | (.056) | -.548***                                        | (.140) |
| Unaccented English                                                       | -.392***                     | (.051) | -.549***                                 | (.090) | -.245***                         | (.056) | -.634***                                        | (.137) |
| Education (ref. = less than HS degree)                                   |                              |        |                                          |        |                                  |        |                                                 |        |
| High school degree                                                       | -.063                        | (.060) | -.129                                    | (.106) | -.062                            | (.067) | -.421*                                          | (.169) |
| Some college                                                             | -.178**                      | (.060) | -.482***                                 | (.112) | -.079                            | (.065) | -.383*                                          | (.174) |
| College degree                                                           | -.205***                     | (.061) | -.407***                                 | (.109) | -.086                            | (.068) | -.383*                                          | (.170) |
| Master's degree                                                          | -.328***                     | (.060) | -.535***                                 | (.109) | -.044                            | (.067) | -.234                                           | (.167) |
| PhD                                                                      | -.239***                     | (.061) | -.370***                                 | (.108) | -.093                            | (.069) | -.349*                                          | (.168) |
| Location of Interaction (ref. = looking for place to rent on your block) |                              |        |                                          |        |                                  |        |                                                 |        |
| Attempting to board an airplane                                          |                              |        |                                          |        | -.438**                          | (.161) |                                                 |        |
| Standing outside a home improvement store                                |                              |        |                                          |        | -.795***                         | (.167) |                                                 |        |
| Standing outside a welfare office                                        |                              |        |                                          |        | -.457**                          | (.157) |                                                 |        |
| Walking in your neighborhood                                             |                              |        |                                          |        | -.332*                           | (.150) |                                                 |        |
| Applying for a job at your place of work                                 |                              |        |                                          |        | .287*                            | (.144) |                                                 |        |
| Constant                                                                 | .267*                        | (.123) |                                          |        | -.846***                         | (.173) |                                                 |        |
| Observations                                                             | 15,109                       |        | 4,894                                    |        | 15,174                           |        | 2,490                                           |        |

Note: Clustered standard errors are in parentheses (except for conditional logit models). Conditional logit models only include profile pairs where one profile is suspected and one is not.

\* $p < .05$ ; \*\* $p < .01$ ; \*\*\* $p < .001$  (two-tailed tests).

**Table S3.** Global Interaction Models by Partisanship and Education Predicting Suspicions of Illegality, Coefficients and SEs

|                                          | Republicans<br>(Including Leaners) |        | Democrats<br>(Including Leaners) |        | Less Than College<br>Degree |        | College Degree + |        |
|------------------------------------------|------------------------------------|--------|----------------------------------|--------|-----------------------------|--------|------------------|--------|
|                                          | Coef.                              | (SE)   | Coef.                            | (SE)   | Coef.                       | (SE)   | Coef.            | (SE)   |
| Country of Origin (ref. = Mexico)        |                                    |        |                                  |        |                             |        |                  |        |
| El Salvador                              | -.042                              | (.034) | .037                             | (.031) | -.018                       | (.034) | .022             | (.029) |
| Cuba                                     | -.019                              | (.033) | -.021                            | (.029) | -.008                       | (.033) | -.027            | (.028) |
| Argentina                                | -.040                              | (.032) | -.017                            | (.030) | -.051                       | (.033) | -.014            | (.028) |
| Haiti                                    | -.069*                             | (.033) | -.031                            | (.031) | -.046                       | (.034) | -.030            | (.030) |
| Nigeria                                  | -.068*                             | (.034) | -.039                            | (.032) | -.059                       | (.035) | -.018            | (.031) |
| Somalia                                  | -.050                              | (.032) | -.035                            | (.031) | -.036                       | (.033) | -.022            | (.029) |
| Syria                                    | -.026                              | (.032) | -.006                            | (.031) | .033                        | (.033) | -.030            | (.029) |
| Pakistan                                 | -.084*                             | (.035) | -.012                            | (.031) | -.049                       | (.034) | -.045            | (.030) |
| India                                    | -.094**                            | (.034) | -.019                            | (.032) | -.057                       | (.034) | -.043            | (.029) |
| China                                    | -.102**                            | (.033) | -.026                            | (.032) | -.053                       | (.036) | -.062*           | (.029) |
| Korea                                    | -.096**                            | (.034) | -.049                            | (.030) | -.063                       | (.033) | -.057            | (.031) |
| Cambodia                                 | -.065                              | (.035) | -.023                            | (.032) | -.052                       | (.035) | -.037            | (.031) |
| Poland                                   | -.135***                           | (.035) | -.001                            | (.031) | -.049                       | (.033) | -.064*           | (.030) |
| Italy                                    | -.130***                           | (.034) | -.037                            | (.031) | -.104**                     | (.034) | -.060*           | (.029) |
| Canada                                   | -.089**                            | (.033) | -.061*                           | (.030) | -.069*                      | (.032) | -.070*           | (.030) |
| Receives Govt. Benefits (ref. = none)    |                                    |        |                                  |        |                             |        |                  |        |
| Welfare                                  | .054*                              | (.023) | -.064***                         | (.019) | .020                        | (.022) | -.029            | (.018) |
| SSI                                      | .001                               | (.021) | -.093***                         | (.019) | -.013                       | (.021) | -.061***         | (.018) |
| Medicaid                                 | -.030                              | (.020) | -.051**                          | (.019) | -.042*                      | (.021) | -.039*           | (.018) |
| Food stamps                              | .014                               | (.021) | -.046*                           | (.019) | -.001                       | (.022) | -.041*           | (.017) |
| EITC                                     | -.059**                            | (.021) | -.089***                         | (.019) | -.077***                    | (.021) | -.063***         | (.018) |
| Police Record (ref. = no record)         |                                    |        |                                  |        |                             |        |                  |        |
| White-collar crime                       | .120***                            | (.020) | .103***                          | (.017) | .111***                     | (.020) | .106***          | (.016) |
| Violent crime                            | .201***                            | (.021) | .147***                          | (.019) | .197***                     | (.020) | .162***          | (.018) |
| Stereotypical immigrant crime            | .216***                            | (.020) | .185***                          | (.019) | .197***                     | (.021) | .216***          | (.017) |
| Minor infraction                         | .005                               | (.019) | -.010                            | (.015) | .010                        | (.019) | -.007            | (.015) |
| Occupation (ref. = unemployed)           |                                    |        |                                  |        |                             |        |                  |        |
| Low-status, informal                     | -.024                              | (.018) | -.001                            | (.017) | -.018                       | (.019) | -.006            | (.016) |
| Low-status, formal                       | -.111***                           | (.019) | -.064***                         | (.017) | -.076***                    | (.019) | -.085***         | (.016) |
| High-status, informal                    | -.063**                            | (.020) | -.004                            | (.017) | -.036                       | (.020) | -.031            | (.016) |
| High-status, formal                      | -.087***                           | (.019) | -.026                            | (.018) | -.049*                      | (.019) | -.060***         | (.016) |
| Gender (ref. = man)                      |                                    |        |                                  |        |                             |        |                  |        |
| Woman                                    | -.004                              | (.012) | -.020                            | (.011) | -.014                       | (.012) | .001             | (.010) |
| Age (ref. =20)                           |                                    |        |                                  |        |                             |        |                  |        |
| 30                                       | -.049**                            | (.018) | -.004                            | (.018) | -.023                       | (.020) | -.045**          | (.016) |
| 40                                       | -.033                              | (.019) | -.041*                           | (.018) | -.029                       | (.020) | -.064***         | (.016) |
| 50                                       | -.037*                             | (.019) | -.037*                           | (.017) | -.040*                      | (.019) | -.053***         | (.016) |
| 60                                       | -.037                              | (.019) | -.041*                           | (.017) | -.043*                      | (.020) | -.051**          | (.016) |
| Years Living in the U.S. (ref. = 1 year) |                                    |        |                                  |        |                             |        |                  |        |
| 5                                        | -.025                              | (.019) | -.023                            | (.017) | -.022                       | (.019) | -.022            | (.016) |
| 10                                       | -.024                              | (.019) | -.040*                           | (.017) | -.026                       | (.019) | -.030            | (.016) |
| 15                                       | -.032                              | (.020) | -.021                            | (.017) | -.036                       | (.020) | -.014            | (.016) |
| 20                                       | -.047*                             | (.019) | -.042*                           | (.017) | -.051**                     | (.020) | -.034*           | (.016) |
| English Fluency (ref. = no English)      |                                    |        |                                  |        |                             |        |                  |        |
| Adequate English                         | -.122***                           | (.018) | -.056***                         | (.016) | -.079***                    | (.017) | -.089***         | (.015) |
| Good, accented English                   | -.122***                           | (.018) | -.045**                          | (.016) | -.088***                    | (.017) | -.090***         | (.015) |
| Unaccented English                       | -.116***                           | (.017) | -.056***                         | (.016) | -.090***                    | (.018) | -.086***         | (.015) |
| Education (ref. = less than HS degree)   |                                    |        |                                  |        |                             |        |                  |        |
| High school degree                       | .002                               | (.021) | -.034                            | (.019) | -.032                       | (.020) | -.003            | (.018) |
| Some college                             | -.024                              | (.021) | -.063***                         | (.019) | -.068**                     | (.021) | -.025            | (.018) |
| College degree                           | -.047*                             | (.021) | -.058**                          | (.019) | -.072***                    | (.022) | -.029            | (.018) |
| Master's degree                          | -.083***                           | (.021) | -.088***                         | (.019) | -.063**                     | (.021) | -.084***         | (.017) |
| PhD                                      | -.058**                            | (.021) | -.054**                          | (.019) | -.070***                    | (.021) | -.046*           | (.018) |
| Constant                                 | .676***                            | (.041) | .461***                          | (.041) | .632***                     | (.042) | .498***          | (.038) |
| Observations                             | 6,741                              | 6,741  | 7,162                            | 7,162  | 6,722                       | 6,722  | 8,377            | 8,377  |
| R-squared                                | .069                               | .069   | .048                             | .048   | .051                        | .051   | .059             | .059   |

Note: Clustered standard errors are in parentheses.

\* $p < .05$ ; \*\* $p < .01$  \*\*\* $p < .001$  (two-tailed tests).

**Table S4.** Global Interaction Models by Respondent Region Predicting Suspicions of Illegality, Coefficients and SEs

|                                          | Midwest Region |        | Northeast Region |        | South Region |        | West Region |        |
|------------------------------------------|----------------|--------|------------------|--------|--------------|--------|-------------|--------|
|                                          | Coef.          | (SE)   | Coef.            | (SE)   | Coef.        | (SE)   | Coef.       | (SE)   |
| Country of Origin (ref. = Mexico)        |                |        |                  |        |              |        |             |        |
| El Salvador                              | -.024          | (.045) | -.017            | (.053) | .039         | (.038) | -.018       | (.047) |
| Cuba                                     | .002           | (.042) | -.013            | (.050) | -.008        | (.038) | -.097*      | (.046) |
| Argentina                                | -.029          | (.042) | -.073            | (.056) | -.028        | (.036) | .001        | (.046) |
| Haiti                                    | -.048          | (.043) | .010             | (.054) | -.018        | (.040) | -.087       | (.048) |
| Nigeria                                  | -.012          | (.044) | .025             | (.058) | -.033        | (.040) | -.126*      | (.050) |
| Somalia                                  | -.031          | (.046) | -.062            | (.045) | .001         | (.039) | -.036       | (.047) |
| Syria                                    | .007           | (.043) | -.047            | (.052) | .021         | (.037) | -.032       | (.050) |
| Pakistan                                 | -.036          | (.045) | -.040            | (.052) | -.019        | (.040) | -.102*      | (.048) |
| India                                    | -.054          | (.045) | -.022            | (.051) | -.037        | (.040) | -.094*      | (.047) |
| China                                    | -.063          | (.042) | -.091            | (.052) | -.044        | (.041) | -.048       | (.052) |
| Korea                                    | -.105*         | (.044) | -.005            | (.050) | -.022        | (.041) | -.111*      | (.050) |
| Cambodia                                 | -.007          | (.047) | -.032            | (.056) | -.029        | (.039) | -.121*      | (.050) |
| Poland                                   | -.013          | (.045) | -.100            | (.056) | -.023        | (.038) | -.152**     | (.047) |
| Italy                                    | -.076          | (.044) | -.095            | (.053) | -.051        | (.039) | -.113*      | (.049) |
| Canada                                   | -.045          | (.043) | -.102*           | (.048) | -.057        | (.038) | -.060       | (.051) |
| Receives Govt. Benefits (ref. = none)    |                |        |                  |        |              |        |             |        |
| Welfare                                  | -.012          | (.027) | .001             | (.034) | -.003        | (.025) | -.013       | (.029) |
| SSI                                      | -.045          | (.026) | -.079**          | (.030) | -.025        | (.024) | -.025       | (.031) |
| Medicaid                                 | -.076**        | (.027) | -.020            | (.031) | -.029        | (.024) | -.033       | (.029) |
| Food stamps                              | -.037          | (.026) | -.028            | (.035) | -.013        | (.025) | -.018       | (.027) |
| EITC                                     | -.087***       | (.026) | -.114***         | (.032) | -.039        | (.023) | -.053       | (.030) |
| Police Record (ref. = no record)         |                |        |                  |        |              |        |             |        |
| White-collar crime                       | .110***        | (.026) | .147***          | (.029) | .093***      | (.021) | .123***     | (.028) |
| Violent crime                            | .194***        | (.026) | .213***          | (.031) | .180***      | (.024) | .143***     | (.028) |
| Stereotypical immigrant crime            | .188***        | (.025) | .250***          | (.031) | .204***      | (.023) | .220***     | (.028) |
| Minor infraction                         | -.021          | (.022) | .045             | (.027) | -.008        | (.021) | .017        | (.024) |
| Occupation (ref. = unemployed)           |                |        |                  |        |              |        |             |        |
| Low-status, informal                     | -.017          | (.024) | -.043            | (.027) | -.012        | (.021) | .019        | (.027) |
| Low-status, formal                       | -.091***       | (.024) | -.115***         | (.028) | -.092***     | (.022) | -.034       | (.025) |
| High-status, informal                    | -.007          | (.026) | -.069*           | (.028) | -.057*       | (.022) | .000        | (.028) |
| High-status, formal                      | -.034          | (.024) | -.077*           | (.030) | -.076***     | (.022) | -.026       | (.026) |
| Gender (ref. = man)                      |                |        |                  |        |              |        |             |        |
| Woman                                    | .006           | (.015) | -.004            | (.018) | -.002        | (.014) | -.034*      | (.017) |
| Age (ref. = 20)                          |                |        |                  |        |              |        |             |        |
| 30                                       | -.020          | (.023) | -.071*           | (.031) | -.017        | (.022) | -.062*      | (.027) |
| 40                                       | -.035          | (.024) | -.129***         | (.029) | -.036        | (.023) | -.030       | (.029) |
| 50                                       | -.067**        | (.022) | -.123***         | (.031) | -.001        | (.022) | -.035       | (.027) |
| 60                                       | -.058*         | (.023) | -.093**          | (.031) | -.029        | (.022) | -.029       | (.027) |
| Years Living in the U.S. (ref. = 1 year) |                |        |                  |        |              |        |             |        |
| 5                                        | .010           | (.024) | -.001            | (.030) | -.043*       | (.022) | -.049       | (.027) |
| 10                                       | .007           | (.024) | -.040            | (.031) | -.051*       | (.021) | -.035       | (.027) |
| 15                                       | -.027          | (.025) | -.029            | (.032) | -.032        | (.021) | .004        | (.029) |
| 20                                       | -.014          | (.025) | -.035            | (.032) | -.061**      | (.021) | -.058*      | (.027) |
| English Fluency (ref. = no English)      |                |        |                  |        |              |        |             |        |
| Adequate English                         | -.071**        | (.022) | -.082**          | (.027) | -.074***     | (.019) | -.118***    | (.027) |
| Good, accented English                   | -.077***       | (.022) | -.058*           | (.026) | -.075***     | (.020) | -.149***    | (.026) |
| Unaccented English                       | -.065**        | (.022) | -.056*           | (.027) | -.088***     | (.019) | -.146***    | (.026) |
| Education (ref. = less than HS degree)   |                |        |                  |        |              |        |             |        |
| High school degree                       | -.003          | (.024) | -.013            | (.033) | -.017        | (.023) | -.016       | (.033) |
| Some college                             | -.012          | (.026) | -.059            | (.034) | -.063**      | (.023) | -.014       | (.032) |
| College degree                           | -.030          | (.026) | -.095**          | (.034) | -.049*       | (.024) | -.011       | (.030) |
| Master's degree                          | -.079**        | (.025) | -.043            | (.035) | -.087***     | (.023) | -.061*      | (.030) |
| PhD                                      | -.025          | (.025) | -.063            | (.034) | -.082***     | (.024) | -.031       | (.030) |
| Constant                                 | .517***        | (.053) | .582***          | (.062) | .558***      | (.049) | .570***     | (.067) |
| Observations                             | 4,186          | 4,186  | 2,579            | 2,579  | 5,124        | 5,124  | 3,220       | 3,220  |
| R-squared                                | .058           | .058   | .075             | .075   | .053         | .053   | .065        | .065   |

Note: Clustered standard errors are in parentheses.

\* $p < .05$ ; \*\* $p < .01$ ; \*\*\* $p < .001$  (two-tailed tests).

## Design Appendix

Introductory Text: Next, identifying immigrants who are in the United States illegally is a government priority. In order to help us better understand this process, you will be presented with pairs of profiles describing different immigrants currently living in the United States. For each pair of profiles, please look at the information carefully, and then indicate whether you suspect each immigrant is in the U.S. illegally. Even if you aren't entirely sure, please indicate your best guess about the legal status of each immigrant.

Dependent Variable 1: Do you think these immigrants are illegal/undocumented? In other words, do you think they lack proper documentation status to be in the United States?

Response Options: Yes, No

Dependent Variable 2: Many local law enforcement organizations are asking for citizens to assist them in their efforts to identify immigrants living in the U.S. illegally.

If you saw these immigrants [location of interaction treatment], would you consider asking local law enforcement to investigate their legal statuses?

Response Options: Yes, No

*See Table 1 in the main text for all randomizations*

## Survey Experiment Screen Shots

**Figure S1.** Screen Shot of Survey Experiment Introduction

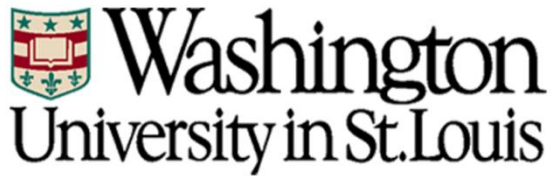

Next, identifying immigrants who are in the United States illegally is a government priority. In order to help us better understand this process, you will be presented with pairs of profiles describing different immigrants currently living in the United States. For each pair of profiles, please look at the information carefully, and then indicate whether you suspect each immigrant is in the U.S. illegally. Even if you aren't entirely sure, please indicate your best guess about the legal status of each immigrant.

You will receive the following categories of information about each immigrant:

|                                                 |
|-------------------------------------------------|
| <b>Education</b>                                |
| <b>Recipient of<br/>Government<br/>Benefits</b> |
| <b>National Origin</b>                          |
| <b>Current Area of<br/>Residence</b>            |
| <b>Occupation</b>                               |
| <b>Years Since Arrival<br/>in the U.S.</b>      |
| <b>Gender</b>                                   |
| <b>Police Record</b>                            |
| <b>English<br/>Proficiency</b>                  |
| <b>Age</b>                                      |

**Figure S2.** Screen Shot of Dependent Variable 1 and Presentation of (Randomized) Profiles

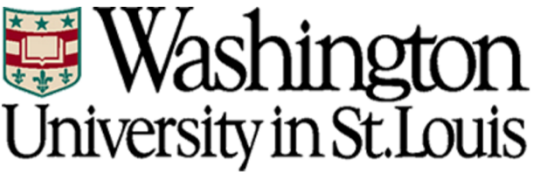

Please read the two profiles carefully. Then, please indicate whether you suspect each immigrant is living in the United States illegally.

|                                  | Immigrant 1                        | Immigrant 2                         |
|----------------------------------|------------------------------------|-------------------------------------|
| Education                        | Did not finish high school         | College degree                      |
| Recipient of Government Benefits | Welfare                            | Welfare                             |
| National Origin                  | Nigeria                            | El Salvador                         |
| Current Area of Residence        | Within 10 miles of southern border | Within 100 miles of southern border |
| Occupation                       | Day laborer                        | Freelance graphic designer          |
| Years Since Arrival in the U.S.  | 20 years                           | 1 year                              |
| Gender                           | Woman                              | Woman                               |
| Police Record                    | Littering                          | No police record                    |
| English Proficiency              | Good, accented English             | Adequate English                    |
| Age                              | 60                                 | 50                                  |

Do you think these immigrants are illegal/undocumented? In other words, do you think they lack proper documentation status to be in the United States?

|             |                       |                       |
|-------------|-----------------------|-----------------------|
|             | Yes                   | No                    |
| Immigrant 1 | <input type="radio"/> | <input type="radio"/> |
| Immigrant 2 | <input type="radio"/> | <input type="radio"/> |



**Figure S3.** Screen Shot of Dependent Variable 3 with Randomized Location of Interaction Treatments and Presentation of (Randomized) Profiles

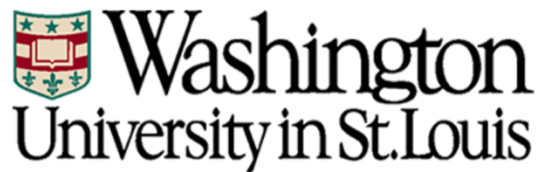

|                                  | Immigrant 1                        | Immigrant 2                         |
|----------------------------------|------------------------------------|-------------------------------------|
| Education                        | Did not finish high school         | College degree                      |
| Recipient of Government Benefits | Welfare                            | Welfare                             |
| National Origin                  | Nigeria                            | El Salvador                         |
| Current Area of Residence        | Within 10 miles of southern border | Within 100 miles of southern border |
| Occupation                       | Day laborer                        | Freelance graphic designer          |
| Years Since Arrival in the U.S.  | 20 years                           | 1 year                              |
| Gender                           | Woman                              | Woman                               |
| Police Record                    | Littering                          | No police record                    |
| English Proficiency              | Good, accented English             | Adequate English                    |
| Age                              | 60                                 | 50                                  |

Many local **law enforcement organizations** are asking for citizens to assist them in their efforts to identify immigrants living in the U.S. illegally.

If you saw these immigrants standing outside of a welfare office, would you consider asking **local law enforcement** to investigate their legal statuses?

|             | Yes                   | No                    |
|-------------|-----------------------|-----------------------|
| Immigrant 1 | <input type="radio"/> | <input type="radio"/> |
| Immigrant 2 | <input type="radio"/> | <input type="radio"/> |
